# Supplementary material for: Self-Rated Health in Migrant and Non-Migrant Women before, during and after Pregnancy: A Population-Based Study of 0.5 Million Pregnancies from the Swedish Pregnancy Register
Source: PubMed Central journal article supplement (PMC7356601; doi:10.3390/jcm9061764), 2020-06-06
Supplement: jcm-09-01764-s001.pdf [file jcm-09-01764-s001.pdf]

## **Supplementary Material**

### **Self-rated health in migrant and non-migrant women**

#### **before, during and after pregnancy**

- a population-based study of 0.5 million pregnancies from the Swedish Pregnancy Register

Pontus Henriksson, Emmie Söderström, Marie Blomberg, Paulina Nowicka, Kerstin

Petersson, Kristin Thomas, Marcus Bendtsen, Fernando Estévez-López, Marie Löf

**Corresponding author:** Pontus Henriksson, Department of Health, Medicine and Caring

Sciences, Linköping University, Linköping 58183, Sweden.

Phone: 46-13281000; Email: [pontus.henriksson@liu.se](mailto:pontus.henriksson@liu.se).

**Table S1.** Poor self-rated health before, during and after pregnancy according to birth country (countries/regions with  $\geq 100$  pregnancies).

| Birth region/country                                   | Poor self-rated health |                      |         |                      |         |                     |
|--------------------------------------------------------|------------------------|----------------------|---------|----------------------|---------|---------------------|
|                                                        | n                      | Before pregnancy (%) | n       | During pregnancy (%) | n       | After pregnancy (%) |
| <b>All countries</b>                                   | 577 765                | 2.9                  | 433 248 | 8.6                  | 426 424 | 2.6                 |
| <b>Sweden</b>                                          | 456 045                | 2.7                  | 354 242 | 8.6                  | 347 562 | 2.5                 |
| <b>Central Europe, Eastern Europe and Central Asia</b> | 28 180                 | 2.8                  | 18 859  | 6.6                  | 18 783  | 2.8                 |
| <i>Central Asia</i>                                    | 2 207                  | 5.2                  | 1 187   | 6.3                  | 1 196   | 3.0                 |
| Armenia                                                | 350                    | 5.1                  | 214     | 11.2                 | 219     | 5.0                 |
| Azerbaijan                                             | 272                    | 6.6                  | 167     | 8.4                  | 170     | 2.9                 |
| Georgia                                                | 145                    | 3.4                  | 69      | 8.7                  | 69      | 2.9                 |
| Kazakhstan                                             | 244                    | 8.2                  | 133     | 8.3                  | 133     | 5.3                 |
| Kyrgyzstan                                             | 141                    | 4.3                  | 78      | 2.6                  | 78      | 2.6                 |
| Mongolia                                               | 523                    | 4.4                  | 259     | 1.2                  | 260     | 1.9                 |
| Uzbekistan                                             | 466                    | 4.3                  | 230     | 5.7                  | 229     | 1.3                 |
| <i>Central Europe</i>                                  | 20 124                 | 2.7                  | 13 795  | 7.2                  | 13 723  | 2.9                 |
| Albania                                                | 1 665                  | 4.1                  | 1 138   | 9.6                  | 1 127   | 3.7                 |
| Bosnia and Herzegovina                                 | 4 873                  | 2.7                  | 3 518   | 8.1                  | 3 488   | 3.8                 |
| Bulgaria                                               | 601                    | 2.0                  | 413     | 6.1                  | 411     | 1.2                 |
| Croatia                                                | 831                    | 2.9                  | 588     | 9.0                  | 578     | 1.7                 |
| Czech Republic                                         | 226                    | 0.9                  | 169     | 3.0                  | 162     | 1.9                 |
| Hungary                                                | 649                    | 3.5                  | 477     | 5.5                  | 480     | 1.9                 |
| Macedonia                                              | 908                    | 2.2                  | 642     | 7.3                  | 648     | 2.5                 |
| Montenegro                                             | 386                    | 3.9                  | 277     | 6.5                  | 278     | 4.0                 |
| Poland                                                 | 5 330                  | 2.2                  | 3 503   | 5.9                  | 3 476   | 2.2                 |
| Romania                                                | 1 842                  | 2.6                  | 1 259   | 6.7                  | 1 262   | 2.9                 |
| Serbia                                                 | 2 501                  | 2.9                  | 1 585   | 8.1                  | 1 590   | 3.4                 |
| Slovakia                                               | 189                    | 3.2                  | 131     | 1.5                  | 129     | 3.1                 |
| Slovenia                                               | 123                    | 1.6                  | 95      | 6.3                  | 94      | 1.1                 |
| <i>Eastern Europe</i>                                  | 5 849                  | 2.3                  | 3 877   | 4.4                  | 3 864   | 2.1                 |
| Belarus                                                | 306                    | 1.3                  | 200     | 2.0                  | 198     | 3.0                 |
| Estonia                                                | 606                    | 1.5                  | 412     | 5.1                  | 414     | 1.2                 |
| Latvia                                                 | 620                    | 1.5                  | 418     | 5.7                  | 415     | 2.7                 |
| Lithuania                                              | 1 089                  | 1.5                  | 770     | 3.1                  | 768     | 1.2                 |
| Moldova                                                | 128                    | 0                    | 85      | 5.9                  | 84      | 3.6                 |
| Russia                                                 | 2 167                  | 3.1                  | 1 379   | 5.2                  | 1 377   | 2.8                 |
| Ukraine                                                | 933                    | 3.0                  | 613     | 3.4                  | 608     | 1.5                 |
| <b>High income countries</b> (Sweden not included)     | 16 308                 | 2.4                  | 11 652  | 7.7                  | 11 587  | 2.7                 |
| <i>Australasia</i>                                     | 243                    | 1.6                  | 158     | 7.0                  | 154     | 3.9                 |
| Australia                                              | 200                    | 1.5                  | 127     | 7.9                  | 124     | 4.0                 |
| <i>High-income Asia Pacific</i>                        | 1 137                  | 2.0                  | 833     | 6.4                  | 824     | 3.4                 |
| Japan                                                  | 342                    | 0.3                  | 240     | 4.6                  | 237     | 2.5                 |
| South Korea                                            | 739                    | 2.6                  | 550     | 7.3                  | 545     | 3.7                 |
| <i>High-income North America</i>                       | 999                    | 1.6                  | 679     | 8.4                  | 676     | 3.8                 |
| Canada                                                 | 225                    | 0.4                  | 138     | 11.6                 | 141     | 4.3                 |
| USA                                                    | 766                    | 1.8                  | 535     | 7.7                  | 529     | 3.8                 |
| <i>Southern Latin America</i>                          | 1 795                  | 4.1                  | 1 164   | 11.2                 | 1 168   | 3.5                 |
| Argentina                                              | 194                    | 4.1                  | 133     | 9.0                  | 134     | 0.7                 |
| Chile                                                  | 1 524                  | 4.2                  | 977     | 11.3                 | 980     | 3.8                 |

Table S1, continued...

| Birth region/county                 | Poor self-rated health |                      |        |                      |        |                     |
|-------------------------------------|------------------------|----------------------|--------|----------------------|--------|---------------------|
|                                     | n                      | before pregnancy (%) | n      | during pregnancy (%) | n      | after pregnancy (%) |
| <b>Western Europe</b>               | 12 134                 | 2.2                  | 8 818  | 7.3                  | 8 765  | 2.4                 |
| Austria                             | 189                    | 3.2                  | 141    | 5.7                  | 138    | 2.2                 |
| Belgium                             | 133                    | 3.8                  | 104    | 7.7                  | 101    | 1.0                 |
| Denmark                             | 1 369                  | 2.9                  | 1 035  | 7.6                  | 1 036  | 2.5                 |
| Finland                             | 2 263                  | 2.0                  | 1 620  | 7.5                  | 1 609  | 2.2                 |
| France                              | 549                    | 1.6                  | 411    | 6.8                  | 404    | 2.2                 |
| Germany                             | 2 284                  | 1.8                  | 1 754  | 6.6                  | 1 748  | 2.5                 |
| Greece                              | 691                    | 1.4                  | 474    | 6.8                  | 472    | 2.8                 |
| Iceland                             | 474                    | 3.0                  | 340    | 10.6                 | 341    | 1.5                 |
| Ireland                             | 114                    | 2.6                  | 73     | 5.5                  | 72     | 0                   |
| Israel                              | 163                    | 3.7                  | 106    | 11.3                 | 104    | 3.8                 |
| Italy                               | 417                    | 2.2                  | 296    | 4.1                  | 291    | 2.4                 |
| Netherlands                         | 382                    | 3.1                  | 297    | 6.4                  | 289    | 2.4                 |
| Norway                              | 1 290                  | 1.9                  | 933    | 9.1                  | 925    | 2.9                 |
| Portugal                            | 143                    | 2.8                  | 92     | 3.3                  | 93     | 3.2                 |
| Spain                               | 620                    | 2.7                  | 413    | 8.0                  | 414    | 2.7                 |
| Switzerland                         | 156                    | 3.2                  | 109    | 2.8                  | 108    | 0.9                 |
| UK                                  | 695                    | 2.4                  | 483    | 8.1                  | 481    | 2.9                 |
| <b>Latin America and Caribbean</b>  | 3 732                  | 4.4                  | 2 456  | 11.5                 | 2 448  | 4.4                 |
| <b>Andean Latin America</b>         | 992                    | 6.3                  | 600    | 12.5                 | 596    | 4.4                 |
| Bolivia                             | 285                    | 8.8                  | 154    | 13.0                 | 148    | 5.4                 |
| Ecuador                             | 156                    | 4.5                  | 98     | 11.2                 | 95     | 1.1                 |
| Peru                                | 551                    | 5.4                  | 348    | 12.6                 | 353    | 4.8                 |
| <b>Caribbean</b>                    | 291                    | 3.8                  | 170    | 12.9                 | 170    | 4.1                 |
| Cuba                                | 157                    | 2.5                  | 82     | 12.2                 | 81     | 7.4                 |
| <b>Central Latin America</b>        | 1 725                  | 3.9                  | 1 183  | 10.9                 | 1 186  | 4.0                 |
| Colombia                            | 899                    | 4.1                  | 617    | 11.0                 | 617    | 3.6                 |
| El Salvador                         | 242                    | 5.8                  | 161    | 9.9                  | 161    | 5.0                 |
| Mexico                              | 221                    | 1.8                  | 162    | 8.0                  | 164    | 4.3                 |
| Venezuela                           | 129                    | 6.2                  | 88     | 17.0                 | 89     | 5.6                 |
| <b>Tropical Latin America</b>       | 724                    | 3.3                  | 503    | 11.3                 | 496    | 5.6                 |
| Brazil                              | 701                    | 3.3                  | 486    | 10.9                 | 481    | 5.6                 |
| <b>North Africa and Middle East</b> | 40 172                 | 5.1                  | 25 257 | 11.1                 | 25 253 | 4.0                 |
| Afghanistan                         | 2 662                  | 7.0                  | 1 696  | 12.4                 | 1 704  | 6.6                 |
| Algeria                             | 342                    | 3.8                  | 196    | 8.2                  | 193    | 4.1                 |
| Egypt                               | 570                    | 5.6                  | 346    | 9.5                  | 352    | 5.4                 |
| Iran                                | 4 059                  | 5.2                  | 2 497  | 13.4                 | 2 494  | 4.5                 |
| Iraq                                | 13 254                 | 4.7                  | 8 469  | 11.5                 | 8 440  | 3.8                 |
| Jordan                              | 608                    | 2.8                  | 356    | 11.2                 | 360    | 3.9                 |
| Kuwait                              | 145                    | 3.4                  | 98     | 10.2                 | 101    | 4.0                 |
| Lebanon                             | 2 555                  | 5.8                  | 1 768  | 13.4                 | 1 746  | 4.6                 |
| Libya                               | 241                    | 2.9                  | 134    | 13.4                 | 134    | 6.0                 |
| Morocco                             | 1 423                  | 5.3                  | 880    | 10.9                 | 871    | 4.5                 |
| Palestine                           | 858                    | 5.7                  | 540    | 10.6                 | 540    | 3.5                 |
| Saudi Arabia                        | 303                    | 4.3                  | 169    | 11.8                 | 174    | 2.9                 |
| Sudan                               | 434                    | 3.7                  | 259    | 7.3                  | 261    | 1.1                 |
| Syria                               | 7 714                  | 5.7                  | 4 977  | 8.4                  | 5 010  | 2.9                 |
| Tunisia                             | 558                    | 5.0                  | 302    | 11.6                 | 301    | 4.3                 |
| Turkey                              | 4 134                  | 4.3                  | 2 361  | 11.5                 | 2 359  | 4.3                 |

Table S1, continued...

| Birth region/country                | Poor self-rated health |                      |        |                      |        |                     |
|-------------------------------------|------------------------|----------------------|--------|----------------------|--------|---------------------|
|                                     | n                      | before pregnancy (%) | N      | during pregnancy (%) | n      | after pregnancy (%) |
| United Arab Emirates                | 107                    | 5.6                  | 76     | 7.9                  | 77     | 2.6                 |
| Yemen                               | 189                    | 5.8                  | 121    | 6.6                  | 125    | 4.0                 |
| <b>South Asia</b>                   | 4 948                  | 3.6                  | 3 206  | 10.2                 | 3 200  | 3.8                 |
| Bangladesh                          | 797                    | 6.5                  | 473    | 14.4                 | 475    | 4.8                 |
| India                               | 2 257                  | 2.7                  | 1 576  | 10.7                 | 1 568  | 3.9                 |
| Pakistan                            | 1 809                  | 3.4                  | 1 101  | 8.2                  | 1 102  | 3.2                 |
| <b>Southeast Asia and East Asia</b> | 9877                   | 2.6                  | 6 830  | 5.6                  | 6 812  | 2.3                 |
| <i>East Asia</i>                    | 2574                   | 1.9                  | 1 822  | 2.4                  | 1 831  | 2.3                 |
| China                               | 2 480                  | 1.9                  | 1 750  | 2.3                  | 1 759  | 2.3                 |
| <i>Southeast Asia</i>               | 7303                   | 2.8                  | 5 008  | 6.8                  | 4 981  | 2.3                 |
| Indonesia                           | 287                    | 2.8                  | 217    | 9.7                  | 219    | 3.2                 |
| Philippines                         | 1 420                  | 3.0                  | 969    | 5.1                  | 963    | 2.6                 |
| Sri Lanka                           | 891                    | 3.1                  | 603    | 13.1                 | 600    | 3.3                 |
| Thailand                            | 3 196                  | 2.5                  | 2 129  | 6.0                  | 2 121  | 1.7                 |
| Vietnam                             | 1 251                  | 3.0                  | 892    | 5.7                  | 881    | 2.6                 |
| <b>Sub-Saharan Africa</b>           | 18 503                 | 3.8                  | 10 746 | 7.9                  | 10 779 | 2.3                 |
| <i>Central sub-Saharan Africa</i>   | 553                    | 5.8                  | 340    | 16.2                 | 337    | 3.3                 |
| Democratic Republic of the Congo    | 479                    | 6.1                  | 290    | 17.2                 | 287    | 3.8                 |
| <i>Eastern Sub-Saharan Africa</i>   | 15 590                 | 3.7                  | 8 881  | 7.3                  | 8 920  | 2.3                 |
| Burundi                             | 411                    | 3.9                  | 290    | 9.7                  | 290    | 2.1                 |
| Eritrea                             | 3 318                  | 3.9                  | 1 899  | 7.3                  | 1 904  | 2.1                 |
| Ethiopia                            | 1 462                  | 4.0                  | 866    | 9.5                  | 867    | 2.7                 |
| Kenya                               | 393                    | 3.8                  | 248    | 5.6                  | 252    | 2.4                 |
| Somalia                             | 9 166                  | 3.6                  | 5 060  | 6.9                  | 5 083  | 2.3                 |
| Tanzania                            | 195                    | 3.6                  | 120    | 8.3                  | 121    | 2.5                 |
| Uganda                              | 410                    | 2.9                  | 248    | 7.3                  | 250    | 4.0                 |
| <i>Southern Sub-Saharan Africa</i>  | 155                    | 0                    | 104    | 7.7                  | 100    | 1.0                 |
| South Africa                        | 105                    | 0                    | 75     | 8.0                  | 72     | 1.4                 |
| <i>Western Sub-Saharan Africa</i>   | 2 205                  | 4.7                  | 1 421  | 9.9                  | 1 422  | 2.4                 |
| Cameroon                            | 222                    | 5.4                  | 145    | 13.8                 | 145    | 0.7                 |
| The Gambia                          | 493                    | 4.3                  | 304    | 9.2                  | 298    | 1.7                 |
| Ghana                               | 292                    | 4.1                  | 203    | 7.4                  | 204    | 2.9                 |
| Nigeria                             | 641                    | 3.9                  | 426    | 8.7                  | 426    | 2.6                 |
| Sierra Leone                        | 113                    | 4.4                  | 66     | 9.1                  | 69     | 1.4                 |

**Table S2.** Proportion of women with data of self-rated health according to birth regions.

|                                                 | n <sup>1</sup> | Data of self-rated health |                  |                 |
|-------------------------------------------------|----------------|---------------------------|------------------|-----------------|
|                                                 |                | Before pregnancy          | During pregnancy | After pregnancy |
| Sweden                                          | 577 919        | 88.0 %                    | 69.8 %           | 68.3 %          |
| Central Europe, Eastern Europe and Central Asia | 38 450         | 87.7 %                    | 60.0 %           | 59.6 %          |
| High income countries                           | 20 952         | 88.7 %                    | 64.6 %           | 64.2 %          |
| Latin America and Caribbean                     | 5 150          | 87.0 %                    | 58.4 %           | 58.2 %          |
| North Africa and Middle East                    | 59 818         | 84.5 %                    | 55.6 %           | 55.6 %          |
| South Asia                                      | 6 898          | 85.4 %                    | 57.1 %           | 56.9 %          |
| Southeast Asia and East Asia                    | 14 503         | 85.7 %                    | 61.2 %           | 60.9 %          |
| Sub-Saharan Africa                              | 31 223         | 81.5 %                    | 48.8 %           | 48.9 %          |
| No reported birth country <sup>2</sup>          | 86 590         | 29.0 %                    | 26.9 %           | 17.7 %          |

<sup>1</sup> Please note that the n is higher than the final analytic samples since pregnancies without data regarding birth country and covariates were excluded in the final analytic sample.

<sup>2</sup> The prevalence of poor self-rated health for those without a reported birth county was 4.4 % before, 10.1 % during and 3.0 % after pregnancy.

Self-rated health in migrant and non-migrant women before, during and after pregnancy, Henriksson et al.

**Table S3.** Odds ratios with 95 % confidences intervals for poor self-rated health before, during and after pregnancy by birth regions.

|                                                 | Poor self-rated health |                       |                      |                       |                      |                       |
|-------------------------------------------------|------------------------|-----------------------|----------------------|-----------------------|----------------------|-----------------------|
|                                                 | Before pregnancy       |                       | During pregnancy     |                       | After pregnancy      |                       |
|                                                 | Unadjusted             | Adjusted <sup>1</sup> | Unadjusted           | Adjusted <sup>1</sup> | Unadjusted           | Adjusted <sup>1</sup> |
| Sweden                                          | Reference              | Reference             | Reference            | Reference             | Reference            | Reference             |
| Central Europe, Eastern Europe and Central Asia | 1.04<br>(0.97, 1.12)   | 0.96<br>(0.89, 1.03)  | 0.75<br>(0.71, 0.79) | 0.73<br>(0.69, 0.78)  | 1.13<br>(1.03, 1.23) | 1.11<br>(1.01, 1.21)  |
| High income countries                           | 0.88<br>(0.80, 0.98)   | 0.89<br>(0.80, 0.99)  | 0.88<br>(0.82, 0.94) | 0.90<br>(0.84, 0.96)  | 1.10<br>(0.98, 1.23) | 1.08<br>(0.97, 1.21)  |
| Latin America and Caribbean                     | 1.68<br>(1.43, 1.96)   | 1.52<br>(1.30, 1.76)  | 1.38<br>(1.22, 1.56) | 1.33<br>(1.17, 1.51)  | 1.82<br>(1.50, 2.21) | 1.70<br>(1.40, 2.07)  |
| North Africa and Middle East                    | 1.96<br>(1.87, 2.05)   | 1.52<br>(1.44, 1.60)  | 1.33<br>(1.27, 1.38) | 1.14<br>(1.10, 1.20)  | 1.65<br>(1.55, 1.77) | 1.53<br>(1.42, 1.64)  |
| South Asia                                      | 1.34<br>(1.16, 1.56)   | 1.28<br>(1.10, 1.49)  | 1.21<br>(1.08, 1.36) | 1.22<br>(1.09, 1.37)  | 1.54<br>(1.28, 1.85) | 1.52<br>(1.27, 1.83)  |
| Southeast Asia and East Asia                    | 0.96<br>(0.85, 1.09)   | 0.80<br>(0.71, 0.91)  | 0.63<br>(0.57, 0.70) | 0.62<br>(0.56, 0.69)  | 0.95<br>(0.81, 1.11) | 0.89<br>(0.76, 1.04)  |
| Sub-Saharan Africa                              | 1.44<br>(1.33, 1.56)   | 0.92<br>(0.84, 0.99)  | 0.91<br>(0.85, 0.98) | 0.71<br>(0.66, 0.77)  | 0.94<br>(0.83, 1.07) | 0.80<br>(0.70, 0.91)  |

<sup>1</sup> Adjusted models included maternal age, parity, educational attainment and body mass index as covariates.

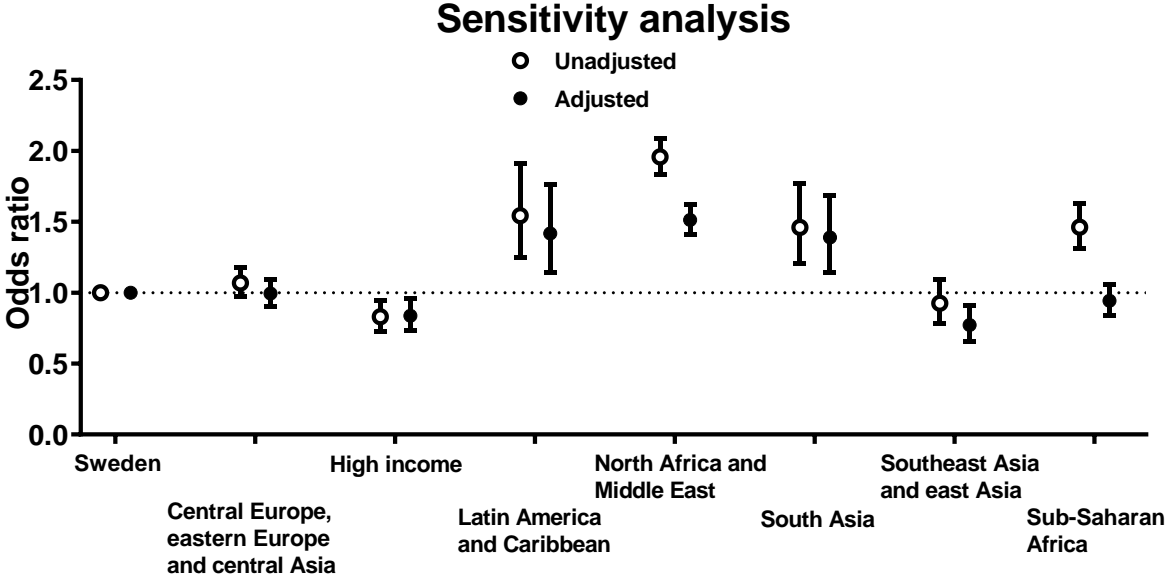

**Figure S1.** Sensitivity analysis showing the odds ratios of poor self-rated health before pregnancy by birth regions for women with **complete data of self-rated health at all time points, i.e. before, during and after pregnancy** (n = 398 025). Logistic regression was utilized to calculate odds ratios with 95% confidence intervals (women born in Sweden was the reference group). The adjusted model included maternal age, parity, educational attainment and body mass index as covariates.

Self-rated health in non-migrant and migrant women before, during and after pregnancy, Henriksson et al.

**Table S4.** Odds ratios with 95 % confidence intervals for poor self-rated health before (n = 576 491 ), during (n = 432 266 ) and after pregnancy (n = 425 468) by birth regions with adjustments for maternal age, parity, educational attainment, body mass index as well as **occupation**.

|                                                 | Poor self-rated health                                              |                                                                     |                                                                    |
|-------------------------------------------------|---------------------------------------------------------------------|---------------------------------------------------------------------|--------------------------------------------------------------------|
|                                                 | Before pregnancy<br>Adjusted <sup>1</sup> + occupation <sup>2</sup> | During pregnancy<br>Adjusted <sup>1</sup> + occupation <sup>2</sup> | After pregnancy<br>Adjusted <sup>1</sup> + occupation <sup>2</sup> |
| Sweden                                          | Reference                                                           | Reference                                                           | Reference                                                          |
| Central Europe, Eastern Europe and Central Asia | 0.93 (0.86, 1.00)                                                   | 0.75 (0.70, 0.79)                                                   | 1.07 (0.98, 1.18)                                                  |
| High income countries                           | 0.86 (0.77, 0.95)                                                   | 0.90 (0.84, 0.97)                                                   | 1.05 (0.94, 1.18)                                                  |
| Latin America and Caribbean                     | 1.50 (1.28, 1.77)                                                   | 1.34 (1.18, 1.52)                                                   | 1.64 (1.34, 1.99)                                                  |
| North Africa and Middle East                    | 1.45 (1.37, 1.53)                                                   | 1.19 (1.14, 1.25)                                                   | 1.43 (1.33, 1.54)                                                  |
| South Asia                                      | 1.14 (0.98, 1.33)                                                   | 1.25 (1.11, 1.40)                                                   | 1.41 (1.17, 1.70)                                                  |
| Southeast Asia and East Asia                    | 0.82 (0.72, 0.94)                                                   | 0.64 (0.58, 0.71)                                                   | 0.87 (0.74, 1.02)                                                  |
| Sub-Saharan Africa                              | 1.02 (0.94, 1.11)                                                   | 0.77 (0.72, 0.83)                                                   | 0.78 (0.68, 0.89)                                                  |

<sup>1</sup> Models included maternal age, parity, educational attainment and body mass index as covariates.

<sup>2</sup> Occupation was classified as i) employed ii) studying iii) parental leave iv) unemployed v) sick leave/disability pension vi) others



**Table S5.** Generalized linear mixed model with a time by region interaction for self-rated health before, during and after pregnancy<sup>1</sup>.

|                                                 | Odds ratios          |                       | Ratio of odds ratios |                       |                      |                       |
|-------------------------------------------------|----------------------|-----------------------|----------------------|-----------------------|----------------------|-----------------------|
|                                                 | Before pregnancy     |                       | During pregnancy     |                       | After pregnancy      |                       |
|                                                 | Unadjusted           | Adjusted <sup>1</sup> | Unadjusted           | Adjusted <sup>1</sup> | Unadjusted           | Adjusted <sup>1</sup> |
| Sweden                                          | Reference            | Reference             | Reference            | Reference             | Reference            | Reference             |
| Central Europe, Eastern Europe and Central Asia | 1.05<br>(0.97, 1.13) | 1.00<br>(0.93, 1.08)  | 0.71<br>(0.65, 0.78) | 0.71<br>(0.65, 0.79)  | 1.07<br>(0.95, 1.21) | 1.08<br>(0.96, 1.21)  |
| High income countries                           | 0.88<br>(0.79, 0.98) | 0.88<br>(0.80, 0.98)  | 1.00<br>(0.88, 1.13) | 1.00<br>(0.89, 1.14)  | 1.25<br>(1.07, 1.46) | 1.26<br>(1.08, 1.47)  |
| Latin America and Caribbean                     | 1.67<br>(1.42, 1.96) | 1.55<br>(1.32, 1.83)  | 0.82<br>(0.67, 1.01) | 0.84<br>(0.68, 1.03)  | 1.08<br>(0.84, 1.39) | 1.10<br>(0.85, 1.42)  |
| North Africa and Middle East                    | 1.94<br>(1.85, 2.04) | 1.65<br>(1.57, 1.73)  | 0.68<br>(0.63, 0.72) | 0.67<br>(0.63, 0.72)  | 0.83<br>(0.76, 0.90) | 0.83<br>(0.76, 0.90)  |
| South Asia                                      | 1.34<br>(1.14, 1.56) | 1.32<br>(1.13, 1.54)  | 0.89<br>(0.74, 1.09) | 0.90<br>(0.74, 1.09)  | 1.13<br>(0.88, 1.44) | 1.13<br>(0.88, 1.44)  |
| Southeast Asia and East Asia                    | 0.98<br>(0.86, 1.11) | 0.91<br>(0.80, 1.03)  | 0.65<br>(0.55, 0.76) | 0.64<br>(0.55, 0.76)  | 0.99<br>(0.81, 1.21) | 0.99<br>(0.80, 1.21)  |
| Sub-Saharan Africa                              | 1.45<br>(1.34, 1.57) | 1.08<br>(0.99, 1.17)  | 0.63<br>(0.56, 0.70) | 0.63<br>(0.57, 0.70)  | 0.65<br>(0.56, 0.75) | 0.65<br>(0.56, 0.76)  |

<sup>1</sup>An additional analysis of the primary outcome was conducted using generalized linear mixed model with a time by region interaction. Sweden was used as the reference region, and before pregnancy was considered baseline. Random effects were added for the intercept and for the time covariates. An unadjusted and an adjusted model was fitted (with the same adjustments as in the primary analysis). The ratio of odds ratio estimates in the table provide the value by how much the before odds ratio should be multiplied with to receive the during/after odds ratio. For instance, in the unadjusted model, the odds ratio before pregnancy comparing North Africa and Middle East with Sweden was 1.94, and so to receive the odds ratio between these two regions during pregnancy we multiply with 0.68, i.e.  $1.94 * 0.68 = 1.32$ . In this way, we can view the ratio of odds ratios as the magnitude of change. Looking at the tables we can see that some of these magnitudes are statistically significant (does not contain 1 in the confidence interval), while we cannot rule out the null value in some cases.

<sup>2</sup> Adjusted models included maternal age, parity, educational attainment and body mass index as covariates.
